# Supplementary material for: Retinopathy of Prematurity and Hearing Impairment in Infants Born with Very-Low-Birth-Weight: Analysis of a Korean Neonatal Network Database
Source: MDPI journal article supplement (doi:10.3390/jcm10204781), 2021-10-19
Supplement: s1 [file s1]

**Supplementary Table S2.** Hearing outcomes in infants treated for retinopathy of prematurity (ROP) separated based on treatment modality at follow-up visit at 18 months of age.

| Hearing impairment outcomes | Laser treatment only | Anti-VEGF therapy only | Both           | <i>P</i> -value* |
|-----------------------------|----------------------|------------------------|----------------|------------------|
| <b>Overall impairment</b>   | 11 / 215 (5.1 %)     | 1 / 63 (1.6 %)         | 4 / 52 (7.7 %) | 0.302            |
| Bilateral impairment        | 7 (63.6%)            | 0                      | 1 (25%)        | 0.282            |
| <b>Deafness</b>             | 0                    | 0                      | 0              | N/A              |

N/A=not applicable; VEGF=vascular endothelial growth factor

\*Fisher's exact test or chi-square test
