# Supplementary material for: Retinopathy of Prematurity and Hearing Impairment in Infants Born with Very-Low-Birth-Weight: Analysis of a Korean Neonatal Network Database
Source: MDPI journal article supplement (doi:10.3390/jcm10204781), 2021-10-19
Supplement: s1 [file s1]

**Supplementary Table S3.** Hearing impairment in children with and without visual impairment at the ages of 18 months and 3 years.

| Outcomes           | With visual impairment*, | Without visual impairment*, | <i>P</i> -value <sup>†</sup> |
|--------------------|--------------------------|-----------------------------|------------------------------|
|                    | No./total (%)            | No./total (%)               |                              |
| Hearing impairment |                          |                             |                              |
| At 18 months       | 1 / 13 (7.7)             | 72 / 2785 (2.6)             | 0.291                        |
| At 3 years         | 1 / 3 (33.3)             | 12 / 666 (1.8)              | 0.057                        |

\*Visual impairment at the same visit

<sup>†</sup>Fisher's exact test
