# Supplementary material for: Retinopathy of Prematurity and Hearing Impairment in Infants Born with Very-Low-Birth-Weight: Analysis of a Korean Neonatal Network Database
Source: MDPI journal article supplement (doi:10.3390/jcm10204781), 2021-10-19
Supplement: s1 [file s1]

**Supplementary Table S1.** Prevalence of retinopathy of prematurity (ROP) and visual/hearing impairment among the infants with both hearing and ophthalmic assessments.

| Outcome                   | Prevalence        |
|---------------------------|-------------------|
| <b>ROP</b>                | 34.3% (982/2,863) |
| <b>Hearing impairment</b> |                   |
| At 18 months              | 2.6% (74/2,828)   |
| At 3 years                | 2.0% (13/666)     |
| <b>Visual impairment</b>  |                   |
| At 18 months              | 0.5% (13/2,742)   |
| At 3 years                | 0.5% (3/665)      |
